# Supplementary material
Source: PubMed Central journal article supplement (PMC102818)
Supplement: nar_28_8_1760__1.pdf [file nar_28_8_1760__1.pdf]

## SUPPLEMENTARY MATERIAL

**Table S1.** Backbone torsion angles (deg) of d(ACCGGCCGGT)<sup>a</sup>

| Base | $\alpha$ | $\beta$ | $\gamma$ | $\delta$ | $\epsilon$ | $\zeta$ | $\chi$ | $P$ |
|------|----------|---------|----------|----------|------------|---------|--------|-----|
| A1   | -67      | 164     | 68       | 80       | -138       | -65     | -162   | 7   |
| C2   | -77      | 171     | 58       | 89       | -155       | -74     | -159   | 8   |
| C3   | -45      | 164     | 59       | 73       | -147       | -79     | -157   | 13  |
| G4   | -57      | 167     | 39       | 86       | -160       | -80     | -156   | 5   |
| G5   | -57      | 159     | 42       | 88       | -147       | -75     | -162   | 4   |
| C6   | -52      | 174     | 49       | 81       | -153       | -77     | -160   | 16  |
| C7   | 154      | -164    | 47       | 86       | -163       | -70     | -156   | 16  |
| G8   | -66      | 172     | 173      | 78       | -145       | -73     | -169   | 12  |
| G9   | -82      | -167    | 57       | 86       | -170       | -65     | -158   | 26  |
| T10  |          |         | 56       | 81       |            |         | -138   | 20  |

<sup>a</sup>Torsion angles along the backbone of the oligonucleotide are defined as:

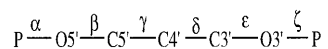

$\chi$  is the glycosyl angle,  $P$  is the pseudorotation angle. The nucleotides are numbered from C1 to G10 in one strand and from G20 to C11 in the other strand. Torsion angles are calculated using the program CURVES v.5.3 [R.Lavery and H.Sklenar (1989) *J. Biomol. Struct. Dyn.*, **6**, 655–667].

**Table S2.** Backbone torsion angles (deg) of r(GCG)d(TATACGC)<sup>a</sup>

| Base | $\alpha$ | $\beta$ | $\gamma$ | $\delta$ | $\epsilon$ | $\zeta$ | $\chi$ | $\rho$ |
|------|----------|---------|----------|----------|------------|---------|--------|--------|
| G1   | -63      | 175     | 40       | 86       | -143       | -74     | -180   | 8      |
| C20  |          |         | 51       | 87       |            |         | -160   | 19     |
| C2   | -70      | -178    | 49       | 82       | -159       | -66     | -156   | 10     |
| G19  | -68      | -177    | 179      | 90       | -152       | -73     | -173   | 17     |
| G3   | -70      | 175     | 51       | 82       | -153       | -76     | -163   | 13     |
| C18  | 139      | -166    | 64       | 84       | -162       | -68     | -153   | 19     |
| T4   | -70      | 167     | 50       | 84       | -149       | -75     | -159   | 20     |
| A17  | -67      | 159     | 47       | 81       | -159       | -72     | -159   | 20     |
| A5   | -53      | 171     | 63       | 80       | -151       | -73     | -160   | 20     |
| T16  | -67      | 176     | 54       | 77       | -154       | -70     | -153   | 17     |
| T6   | -61      | 162     | 44       | 87       | -145       | -86     | -152   | 14     |
| A15  | -74      | 179     | 58       | 82       | -169       | -73     | -168   | 18     |
| A7   | -67      | 163     | 51       | 83       | -148       | -80     | -157   | 17     |
| T14  | -74      | 166     | 53       | 77       | -148       | -66     | -160   | 6      |
| C8   | -83      | 175     | 57       | 83       | -155       | -63     | -156   | 17     |
| G13  | -62      | 170     | 67       | 71       | -148       | -67     | 161    | 11     |
| G9   | -72      | -172    | 57       | 81       | -160       | -61     | -170   | 20     |
| C12  | -73      | 171     | 50       | 80       | -156       | -67     | -159   | 18     |
| C10  |          |         | 47       | 83       |            |         | -156   | 24     |
| G11  | -68      | 180     | 57       | 80       | -148       | -72     | -179   | 10     |

<sup>a</sup>See footnote for Table S1.**Table S3.** Backbone torsion angles (deg) of r(GC)d(GTATAGCG)<sup>a</sup>

| Base | $\alpha$ | $\beta$ | $\gamma$ | $\delta$ | $\epsilon$ | $\zeta$ | $\chi$ | $\rho$ |
|------|----------|---------|----------|----------|------------|---------|--------|--------|
| G1   | -69      | 173     | -30      | 113      | -135       | -71     | 179    | 330    |
| C20  |          |         | 63       | 83       |            |         | -156   | 42     |
| C2   | -82      | -178    | 44       | 80       | -170       | -62     | -160   | 13     |
| G19  | -99      | -172    | 68       | 96       | -168       | -65     | -176   | 55     |
| G3   | -81      | -171    | 70       | 90       | -168       | -73     | -167   | 21     |
| C18  | -78      | -166    | 41       | 135      | -179       | -109    | -122   | 142    |
| T4   | 137      | 164     | 55       | 84       | -143       | -70     | -146   | 16     |
| A17  | -36      | 165     | 47       | 86       | -149       | -85     | -155   | 25     |
| A5   | -73      | 175     | -169     | 84       | -154       | -69     | -163   | 20     |
| T16  | -62      | 170     | 54       | 84       | -151       | -79     | -153   | 18     |
| T6   | -69      | 172     | 53       | 88       | -161       | -77     | -159   | 22     |
| A15  | -81      | -176    | 56       | 86       | -169       | -67     | -156   | 6      |
| A7   | -62      | 170     | 47       | 83       | -156       | -73     | -149   | 14     |
| T14  | -73      | 177     | 47       | 85       | -162       | -66     | -159   | 17     |
| C8   | -69      | 175     | 53       | 83       | -160       | -68     | -155   | 19     |
| G13  | -68      | -179    | 54       | 87       | -155       | -72     | 167    | 12     |
| G9   | -67      | -178    | 51       | 76       | -161       | -66     | -167   | 21     |
| C12  | -50      | 168     | 37       | 85       | -158       | -83     | -162   | 19     |
| C10  |          |         | 50       | 89       |            |         | -158   | 20     |
| G11  | -53      | 179     | 67       | 81       | -147       | -73     | -171   | 11     |

<sup>a</sup>See footnote for Table S1.

**Table S4.** Backbone torsion angles (deg) of r(G)d(CGTATACGC)<sup>a</sup>

| Base | $\alpha$ | $\beta$ | $\gamma$ | $\delta$ | $\epsilon$ | $\zeta$ | $\chi$ | $P$ |
|------|----------|---------|----------|----------|------------|---------|--------|-----|
| G1   | -71      | 167     | 49       | 85       | -142       | -73     | -180   | 14  |
| C20  |          |         | 56       | 82       |            |         | -154   | 36  |
| C2   | 138      | -176    | 63       | 92       | -176       | -66     | -167   | 31  |
| G19  | -80      | 179     | -178     | 98       | -135       | -65     | -178   | 346 |
| G3   | -65      | -171    | -170     | 95       | -153       | -74     | 176    | 14  |
| C18  | 154      | -166    | 66       | 86       | 178        | -78     | -152   | 24  |
| T4   | 120      | -162    | 38       | 96       | -141       | -75     | -146   | 16  |
| A17  | -73      | 166     | 41       | 87       | -156       | -71     | -148   | 17  |
| A5   | -75      | 172     | -163     | 89       | -159       | -74     | -159   | 15  |
| T16  | -66      | 178     | 54       | 82       | -159       | -81     | -151   | 17  |
| T6   | -68      | 169     | 58       | 74       | -151       | -62     | -154   | 9   |
| A15  | -72      | 177     | 48       | 88       | -158       | -75     | -164   | 18  |
| A7   | 127      | -168    | 58       | 78       | -162       | -70     | -158   | 16  |
| T14  | -73      | -179    | 49       | 81       | -156       | -69     | -158   | 16  |
| C8   | -59      | 173     | -161     | 88       | -152       | -68     | -164   | 0   |
| G13  | -79      | -173    | -176     | 89       | -156       | -69     | -167   | 6   |
| G9   | -64      | 174     | 51       | 83       | -161       | -77     | -156   | 17  |
| C12  | 138      | -157    | 51       | 84       | -163       | -76     | -155   | 25  |
| C10  |          |         | 56       | 82       |            |         | -150   | 12  |
| G11  | -62      | 166     | 172      | 87       | -146       | -75     | -172   | 358 |

<sup>a</sup>See footnote for Table S1.**Table S5.** Helical parameters for d(ACCGGCCGGT)<sup>a</sup>

| Base      | x-disp | Roll | Tilt | Incl | $\omega$ | $\kappa$ | $\Omega$ | Rise<br>(Å) |
|-----------|--------|------|------|------|----------|----------|----------|-------------|
| A1 . G20  | -4.33  | -0.2 | -2.7 | 12.7 | -15.7    | -4.5     | 37.4     | 2.68        |
| C2 . G19  | -3.85  | -1.4 | -0.7 | 10.2 | -15.6    | 8.3      | 34.4     | 2.99        |
| C3 . A18  | -4.13  | 5.2  | -4.5 | 10.9 | -15.5    | 7.8      | 28.3     | 2.61        |
| G4 . G17  | -4.05  | 1.9  | -0.7 | 9.6  | -12.4    | 10.4     | 35.5     | 2.80        |
| G5 . T16  | -4.23  | -1.5 | 0.0  | 11.0 | -20.2    | 1.8      | 34.8     | 2.98        |
| C6 . A15  | -4.23  | 1.9  | 0.7  | 11.0 | -20.2    | -1.8     | 35.5     | 2.80        |
| C7 . A14  | -4.05  | 5.2  | 4.5  | 9.6  | -12.4    | -10.4    | 28.3     | 2.61        |
| G8 . G13  | -4.13  | -1.4 | 0.7  | 10.9 | -15.5    | -7.8     | 34.4     | 2.99        |
| G9 . C12  | -3.85  | -0.2 | 2.7  | 10.2 | -15.6    | -8.3     | 37.4     | 2.68        |
| T10 . C11 | -4.33  |      |      | 12.7 | -15.7    | 4.4      |          |             |

<sup>a</sup>These parameters are calculated using the program CURVES v.5.3 [R.Lavery and H.Sklenar (1989) *J. Biomol. Struct. Dyn.*, **6**, 655–667].

**Table S6.** Helical parameters for r(GCG)d(TATACGC)<sup>a</sup>

| Base      | x-disp | Roll | Tilt | Incl | $\omega$ | $\kappa$ | $\Omega$ | Rise<br>(Å) |
|-----------|--------|------|------|------|----------|----------|----------|-------------|
| G1 . C20  | -4.74  | -7.6 | 1.4  | 11.6 | -7.3     | 4.1      | 37.5     | 2.76        |
| C2 . G19  | -4.26  | 9.2  | -1.2 | 12.5 | -15.1    | 3.8      | 30.7     | 2.93        |
| G3 . C18  | -4.53  | -2.9 | -2.0 | 13.5 | -17.4    | -12.8    | 33.1     | 2.40        |
| T4 . A17  | -4.50  | 6.2  | 1.4  | 14.5 | -10.9    | -4.6     | 31.0     | 2.52        |
| A5 . T16  | -4.47  | -2.5 | -0.2 | 15.4 | -16.8    | 1.7      | 34.7     | 2.48        |
| T6 . A15  | -3.99  | 8.1  | 0.6  | 14.6 | -18.2    | 7.5      | 31.1     | 2.64        |
| A7 . T14  | -4.43  | -3.1 | 2.9  | 14.1 | -15.8    | 9.4      | 32.9     | 2.59        |
| C8 . G13  | -4.32  | 5.5  | -2.4 | 15.3 | -21.3    | 10.6     | 34.1     | 3.13        |
| G9 . C12  | -4.53  | -6.5 | 2.2  | 12.1 | -12.5    | -3.5     | 34.5     | 2.71        |
| C10 . G11 | -4.20  |      |      | 13.8 | -0.3     | -0.6     |          |             |

<sup>a</sup>See footnote for Table S5.**Table S7.** Helical parameters for r(GC)d(GTATACGC)<sup>a</sup>

| Base      | x-disp | Roll | Tilt | Incl | $\omega$ | $\kappa$ | $\Omega$ | Rise<br>(Å) |
|-----------|--------|------|------|------|----------|----------|----------|-------------|
| G1 . C20  | -4.42  | -9.4 | -1.9 | 11.2 | -5.4     | 3.7      | 38.3     | 3.23        |
| C2 . G19  | -4.13  | 1.4  | 2.5  | 8.4  | -16.4    | 3.7      | 33.3     | 3.67        |
| G3 . C18  | -4.07  | 4.7  | -7.6 | 12.9 | -1.4     | -20.4    | 31.1     | 2.13        |
| T4 . A17  | -4.52  | 16.1 | -2.6 | 10.9 | -12.9    | -6.7     | 26.8     | 2.22        |
| A5 . T16  | -4.17  | -2.7 | -2.5 | 11.2 | -11.0    | -0.1     | 34.0     | 2.80        |
| T6 . A15  | -3.95  | 8.1  | -1.7 | 9.3  | -15.0    | 6.1      | 33.1     | 2.62        |
| A7 . T14  | -4.24  | 2.2  | -2.0 | 8.2  | -16.0    | 8.8      | 31.6     | 2.96        |
| C8 . G13  | -4.25  | 3.7  | -6.3 | 6.2  | -12.0    | 7.1      | 27.8     | 3.37        |
| G9 . C12  | -4.24  | 0.4  | -1.1 | 2.4  | 1.0      | -0.3     | 28.8     | 3.02        |
| C10 . G11 | -4.37  |      |      | 2.9  | 4.5      | 6.3      |          |             |

<sup>a</sup>See footnote for Table S5.

**Table S8.** Helical parameters for r(G)d(CGTATACGC)<sup>a</sup>

| Base      | x-disp | Roll | Tilt | Incl | $\omega$ | $\kappa$ | $\Omega$ | Rise<br>(Å) |
|-----------|--------|------|------|------|----------|----------|----------|-------------|
| G1 . C20  | -4.45  | -3.6 | -1.7 | 9.9  | -8.0     | 0.2      | 38.0     | 2.91        |
| C2 . G19  | -4.67  | 0.1  | 4.1  | 6.9  | -9.5     | 0.1      | 26.6     | 3.43        |
| G3 . C18  | -4.16  | -2.3 | -4.5 | 12.0 | -13.7    | -13.8    | 37.3     | 2.58        |
| T4 . A17  | -5.00  | 15.1 | 0.4  | 12.2 | -16.0    | -11.1    | 29.3     | 2.18        |
| A5 . T16  | -4.09  | -1.7 | -0.9 | 14.0 | -8.9     | -3.5     | 33.6     | 2.56        |
| T6 . A15  | -4.63  | 10.3 | 2.4  | 12.4 | -14.1    | 3.2      | 34.4     | 2.49        |
| A7 . T14  | -4.53  | -1.7 | 3.5  | 11.3 | -22.6    | -1.5     | 33.2     | 2.62        |
| C8 . G13  | -4.24  | 3.0  | -1.9 | 9.4  | -13.8    | -1.6     | 26.4     | 3.14        |
| G9 . C12  | -4.54  | -6.1 | -2.1 | 8.5  | -13.1    | -2.4     | 34.6     | 2.91        |
| C10 . G11 | -4.55  |      |      | 8.4  | 0.4      | 6.6      |          |             |

<sup>a</sup>See footnote for Table S5.
